# Supplementary material for: Analysis of genetic polymorphisms and tropism in East African Leishmania donovani by Amplified Fragment Length Polymorphism and kDNA minicircle sequencing
Source: PubMed Central journal article supplement (PMC6218636; doi:10.1016/j.meegid.2018.07.016), 2018-11
Supplement: mmc2.pdf [file mmc2.pdf]

**Table S2: List of primers and double-stranded adaptors used for AFLP**

| Type of sequences                             | Name                 | Sequence                                                                    |
|-----------------------------------------------|----------------------|-----------------------------------------------------------------------------|
| <b>Double-strand adaptors</b>                 | <i>Pst</i> I-adaptor | 5'-CTCGTAGACTGCGTACATGCA-3'<br>                   <br>3'-CATCT GACGCATGT-5' |
|                                               | <i>Taq</i> I-adaptor | 5'-GACGATGA GT CC TGAG-3'<br>                  <br>3'-TACT C AGG ACTCGC-5'  |
| <b>Pre-selective primers</b>                  | <i>Pst</i> I+0       | GACTGCGTACATGCAG                                                            |
|                                               | <i>Taq</i> I+0       | GATGAGTCCTGAGCGA                                                            |
| <b><i>Taq</i>I-specific selective primers</b> | Taq+AA               | GATGAGTCCTGAGCGAAA                                                          |
|                                               | Taq+AC               | GATGAGTCCTGAGCGAAC                                                          |
|                                               | Taq+AG               | GATGAGTCCTGAGCGAAG                                                          |
| <b><i>Pst</i>I-specific selective primers</b> | <i>Pst</i> I+AG      | <b>6FAM</b> -GACTGCGTACATGCAGAG                                             |
|                                               | <i>Pst</i> I+CC      | <b>NED</b> -GACTGCGTACATGCAGCC                                              |
|                                               | <i>Pst</i> I+GT      | <b>PET</b> -GACTGCGTACATGCAGGT                                              |
|                                               | <i>Pst</i> I+TG      | <b>VIC</b> -GACTGCGTACATGCAGTG                                              |

The six primer pairs used to draw the phylogenetic tree in fig 1: *Taq*+AA & *Pst*I+AG, *Taq*+AC & *Pst*I+AG, *Taq*+AA & *Pst*I+TG, *Taq*+AC & *Pst*I+TG, *Taq*+AG & *Pst*I+TG and *Taq*+AC & *Pst*I+CC
